# Supplementary material for: Hypersensitive Response-Like Reaction Is Associated with Hybrid Necrosis in Interspecific Crosses between Tetraploid Wheat and Aegilops tauschii Coss
Source: PubMed Central journal article supplement (PMC2892878; doi:10.1371/journal.pone.0011326), 2010-06-25
Supplement: pone.0011326.s001.pdf [file pone.0011326.s001.pdf]

**Table S1** Accession numbers, origins, sublineages, and triploid F<sub>1</sub> hybrid phenotypes of *Ae. tauschii* accessions used in this study

| Accession number | Country     | Lower taxon                  | Sublineage* | F <sub>1</sub> phenotype |
|------------------|-------------|------------------------------|-------------|--------------------------|
| KU-2627          | Afghanistan | var. <i>typica</i>           | 1-1         | type II necrosis         |
| KU-2012          | Afghanistan | var. <i>typica</i>           | 1-2         | type II necrosis         |
| KU-2016          | Afghanistan | var. <i>typica</i>           | 1-2         | type II necrosis         |
| KU-2022          | Afghanistan | var. <i>typica</i>           | 1-2         | WT                       |
| KU-2025          | Afghanistan | var. <i>typica</i>           | 1-2         | type II necrosis         |
| KU-2027          | Afghanistan | var. <i>typica</i>           | 1-2         | WT                       |
| KU-2028          | Afghanistan | var. <i>anathera</i>         | 1-2         | not determined           |
| KU-2032          | Afghanistan | var. <i>typica</i>           | 1-2         | not determined           |
| KU-2042          | Afghanistan | var. <i>typica</i>           | 1-2         | type II necrosis         |
| KU-2043          | Afghanistan | var. <i>typica</i>           | 1-2         | type II necrosis         |
| KU-2056          | Afghanistan | var. <i>typica</i>           | 1-2         | not determined           |
| KU-2058          | Afghanistan | var. <i>typica</i>           | 1-2         | not determined           |
| KU-2059          | Afghanistan | var. <i>anathera</i>         | 1-2         | WT                       |
| KU-2621          | Afghanistan | var. <i>typica</i>           | 1-2         | type II necrosis         |
| KU-2633          | Afghanistan | var. <i>typica</i>           | 1-2         | type II necrosis         |
| KU-2636          | Afghanistan | var. <i>anathera</i>         | 1-2         | not determined           |
| KU-2638          | Afghanistan | var. <i>typica</i>           | 1-2         | type II necrosis         |
| KU-2639          | Afghanistan | var. <i>typica</i>           | 1-2         | type II necrosis         |
| PI 476874        | Afghanistan | var. <i>typica</i>           | 1-2         | WT                       |
| CGN10734         | Armenia     | var. <i>typica</i>           | 1-2         | type III necrosis        |
| IG126280         | Armenia     | var. <i>typica</i>           | 1-5         | WT                       |
| IG126293         | Armenia     | var. <i>typica</i>           | 1-5         | not determined           |
| IG48747          | Armenia     | var. <i>typica</i>           | 1-5         | not determined           |
| KU-2810          | Armenia     | var. <i>typica</i>           | 1-5         | WT                       |
| KU-2816          | Armenia     | var. <i>typica</i>           | 1-5         | WT                       |
| KU-2824          | Armenia     | var. <i>typica</i>           | 1-5         | WT                       |
| KU-2811          | Armenia     | var. <i>typica</i>           | 2-1         | WT                       |
| IG47196          | Azerbaijan  | var. <i>typica</i>           | 1-3         | type III necrosis        |
| IG 47182         | Azerbaijan  | var. <i>typica</i>           | 2-2         | severe growth abortion   |
| KU-2801          | Azerbaijan  | var. <i>typica</i>           | 2-2         | not determined           |
| KU-2806          | Azerbaijan  | var. <i>typica</i>           | 2-2         | not determined           |
| CGN10732         | Azerbaijan  | var. <i>typica</i>           | 2-3         | severe growth abortion   |
| IG47188          | Azerbaijan  | var. <i>typica</i>           | 2-3         | severe growth abortion   |
| IG47202          | Azerbaijan  | var. <i>typica</i>           | 2-3         | hybrid chlorosis         |
| PI508262         | China       | var. <i>typica</i>           | 1-3         | not determined           |
| AT47             | China       | var. <i>typica</i>           | 1-6         | WT                       |
| AT55             | China       | var. <i>typica</i>           | 1-6         | WT                       |
| AT60             | China       | var. <i>typica</i>           | 1-6         | not determined           |
| AT80             | China       | var. <i>typica</i>           | 1-6         | WT                       |
| PI508264         | China       | var. <i>typica</i>           | 1-6         | not determined           |
| KU-20-1          | Dagestan    | var. <i>typica</i>           | 2-1         | hybrid chlorosis         |
| IG 120866        | Dagestan    | var. <i>typica</i>           | 2-2         | severe growth abortion   |
| KU-2828          | Georgia     | var. <i>typica</i>           | 1-2         | type III necrosis        |
| KU-2826          | Georgia     | var. <i>typica</i>           | 1-3         | type III necrosis        |
| KU-2834          | Georgia     | var. <i>typica</i>           | 1-3         | not determined           |
| AE454            | Georgia     | var. <i>typica</i>           | HGL17       | WT                       |
| AE929            | Georgia     | var. <i>typica</i>           | HGL17       | WT                       |
| KU-2829A         | Georgia     | var. <i>typica</i>           | HGL17       | WT                       |
| IG48042          | India       | var. <i>typica</i>           | 1-2         | WT                       |
| KU-2154          | Iran        | var. <i>typica</i>           | 1-2         | type II necrosis         |
| KU-2068          | Iran        | var. <i>typica</i>           | 1-3         | type II necrosis         |
| KU-2087          | Iran        | var. <i>typica</i>           | 1-3         | type II necrosis         |
| KU-2122          | Iran        | var. <i>typica</i>           | 1-4         | type II necrosis         |
| KU-2144          | Iran        | var. <i>typica</i>           | 1-5         | WT                       |
| KU-2145          | Iran        | var. <i>typica</i>           | 1-5         | type III necrosis        |
| KU-2152          | Iran        | var. <i>typica</i>           | 1-5         | WT                       |
| KU-2157          | Iran        | var. <i>typica</i>           | 1-5         | WT                       |
| KU-20-8          | Iran        | var. <i>typica</i>           | 2-1         | WT                       |
| KU-2069          | Iran        | var. <i>typica</i>           | 2-1         | hybrid chlorosis         |
| KU-2078          | Iran        | ssp. <i>strangulata</i> Eig. | 2-1         | WT                       |
| KU-2083          | Iran        | var. <i>typica</i>           | 2-1         | WT                       |
| KU-2111          | Iran        | var. <i>typica</i>           | 2-1         | hybrid chlorosis         |
| KU-2118          | Iran        | var. <i>typica</i>           | 2-1         | WT                       |

|           |              |                              |     |                        |
|-----------|--------------|------------------------------|-----|------------------------|
| KU-2124   | Iran         | var. <i>typica</i>           | 2-1 | WT                     |
| KU-2126   | Iran         | var. <i>typica</i>           | 2-1 | WT                     |
| KU-2155   | Iran         | var. <i>typica</i>           | 2-1 | not determined         |
| KU-2156   | Iran         | var. <i>typica</i>           | 2-1 | WT                     |
| KU-20-10  | Iran         | var. <i>meyeri</i>           | 2-2 | not determined         |
| KU-2088   | Iran         | ssp. <i>strangulata</i> Eig. | 2-2 | WT                     |
| KU-2096   | Iran         | var. <i>typica</i>           | 2-2 | WT                     |
| KU-2100   | Iran         | var. <i>meyeri</i>           | 2-2 | WT                     |
| KU-2110   | Iran         | var. <i>typica</i>           | 2-2 | severe growth abortion |
| KU-2160   | Iran         | var. <i>meyeri</i>           | 2-2 | WT                     |
| KU-2074   | Iran         | ssp. <i>strangulata</i> Eig. | 2-3 | WT                     |
| KU-2075   | Iran         | ssp. <i>strangulata</i> Eig. | 2-3 | WT                     |
| KU-2076   | Iran         | ssp. <i>strangulata</i> Eig. | 2-3 | WT                     |
| KU-2077   | Iran         | ssp. <i>strangulata</i> Eig. | 2-3 | not determined         |
| KU-2079   | Iran         | ssp. <i>strangulata</i> Eig. | 2-3 | WT                     |
| KU-2080   | Iran         | ssp. <i>strangulata</i> Eig. | 2-3 | WT                     |
| KU-2090   | Iran         | ssp. <i>strangulata</i> Eig. | 2-3 | WT                     |
| KU-2091   | Iran         | ssp. <i>strangulata</i> Eig. | 2-3 | WT                     |
| KU-2092   | Iran         | ssp. <i>strangulata</i> Eig. | 2-3 | WT                     |
| KU-2093   | Iran         | ssp. <i>strangulata</i> Eig. | 2-3 | WT                     |
| KU-2097   | Iran         | var. <i>typica</i>           | 2-3 | WT                     |
| KU-2098   | Iran         | var. <i>typica</i>           | 2-3 | WT                     |
| KU-2101   | Iran         | var. <i>typica</i>           | 2-3 | WT                     |
| KU-2102   | Iran         | var. <i>typica</i>           | 2-3 | WT                     |
| KU-2103   | Iran         | var. <i>typica</i>           | 2-3 | WT                     |
| KU-2104   | Iran         | var. <i>typica</i>           | 2-3 | WT                     |
| KU-2105   | Iran         | var. <i>typica</i>           | 2-3 | WT                     |
| KU-2106   | Iran         | var. <i>typica</i>           | 2-3 | WT                     |
| KU-2108   | Iran         | var. <i>meyeri</i>           | 2-3 | WT                     |
| KU-2158   | Iran         | var. <i>meyeri</i>           | 2-3 | WT                     |
| KU-2159   | Iran         | var. <i>typica</i>           | 2-3 | WT                     |
| AE1090    | Kazakhstan   | var. <i>typica</i>           | 1-4 | WT                     |
| IG 131606 | Kyrgyzstan   | var. <i>typica</i>           | 1-4 | WT                     |
| CGN10769  | Pakistan     | var. <i>typica</i>           | 1-1 | type II necrosis       |
| CGN10767  | Pakistan     | var. <i>typica</i>           | 1-2 | type II necrosis       |
| CGN10768  | Pakistan     | var. <i>typica</i>           | 1-2 | WT                     |
| CGN10770  | Pakistan     | var. <i>typica</i>           | 1-2 | WT                     |
| IG46663   | Pakistan     | var. <i>typica</i>           | 1-2 | WT                     |
| IG46682   | Pakistan     | var. <i>typica</i>           | 1-4 | not determined         |
| KU-20-6   | Pakistan     | var. <i>anathera</i>         | 1-4 | not determined         |
| KU-2001   | Pakistan     | var. <i>anathera</i>         | 1-4 | type II necrosis       |
| KU-2003   | Pakistan     | var. <i>anathera</i>         | 1-4 | type II necrosis       |
| IG47259   | Syria        | var. <i>typica</i>           | 1-4 | WT                     |
| IG46623   | Syria        | var. <i>typica</i>           | 2-2 | WT                     |
| IG48554   | Tajikistan   | var. <i>typica</i>           | 1-2 | WT                     |
| AE1038    | Tajikistan   | var. <i>typica</i>           | 1-4 | not determined         |
| IG48559   | Tajikistan   | var. <i>typica</i>           | 1-4 | not determined         |
| KU-2136   | Turkey       | var. <i>typica</i>           | 1-2 | WT                     |
| PI 554319 | Turkey       | var. <i>typica</i>           | 1-2 | type II necrosis       |
| KU-2132   | Turkey       | var. <i>typica</i>           | 1-5 | WT                     |
| PI486277  | Turkey       | var. <i>typica</i>           | 1-5 | not determined         |
| PI 486267 | Turkey       | var. <i>typica</i>           | 2-1 | not determined         |
| IG48508   | Turkmenistan | var. <i>typica</i>           | 1-1 | not determined         |
| IG126387  | Turkmenistan | var. <i>typica</i>           | 1-2 | WT                     |
| IG48518   | Turkmenistan | var. <i>typica</i>           | 1-2 | type II necrosis       |
| IG126489  | Turkmenistan | var. <i>typica</i>           | 1-5 | type II necrosis       |
| IG48539   | Uzbekistan   | var. <i>typica</i>           | 1-1 | not determined         |
| IG48567   | Uzbekistan   | var. <i>typica</i>           | 1-1 | not determined         |
| IG48565   | Uzbekistan   | var. <i>typica</i>           | 1-2 | type II necrosis       |

\*: Mizuno et al. [28]

KU: Plant Germ-Plasm Institute, Faculty of Agriculture, Kyoto University, Japan.

PI: National Small Grains Research Facility, USDA-ARS, USA.

IG: International Centre for Agricultural Research in the Dry Areas (ICARDA), Syria.

AE: Institut für Pflanzengenetik und Kulturpflanzenforschung (IPK), Germany.

AT: Faculty of Agriculture, Okayama University, Japan.
