# Supplementary material for: Hypersensitive Response-Like Reaction Is Associated with Hybrid Necrosis in Interspecific Crosses between Tetraploid Wheat and Aegilops tauschii Coss
Source: PubMed Central journal article supplement (PMC2892878; doi:10.1371/journal.pone.0011326), 2010-06-25
Supplement: pone.0011326.s002.pdf [file pone.0011326.s002.pdf]

**Table S2** Geographical distribution of the triploid F<sub>1</sub> hybrid phenotypes in the *Ae. tauschii* populations

|                        | southwest | central   | east     | middle-eastern | Caspian   | Caucasus  | Total      |
|------------------------|-----------|-----------|----------|----------------|-----------|-----------|------------|
|                        | Asia      | Asia      | China    | Asia           |           |           |            |
| WT                     | 8         | 4         | 3        | 9              | 29        | 8         | 61         |
| type III necrosis      | 0         | 0         | 0        | 1              | 0         | 4         | 5          |
| type II necrosis       | 15        | 2         | 0        | 4              | 1         | 0         | 22         |
| hybrid chlorosis       | 0         | 0         | 0        | 1              | 1         | 2         | 4          |
| severe growth abortion | 0         | 0         | 0        | 0              | 1         | 4         | 5          |
| <u>not determined</u>  | <u>8</u>  | <u>5</u>  | <u>2</u> | <u>3</u>       | <u>2</u>  | <u>5</u>  | <u>25</u>  |
| <b>Total</b>           | <b>31</b> | <b>11</b> | <b>5</b> | <b>18</b>      | <b>34</b> | <b>23</b> | <b>122</b> |

Southwest and central Asia and east China are eastern habitats ( $\geq 60^\circ$  longitude) of the *Ae. tauschii* accessions.

Middle-eastern Asia, Caspian and Caucasus areas are western habitats ( $< 60^\circ$  longitude) of *Ae. tauschii*.
