# Supplementary material for: Hypersensitive Response-Like Reaction Is Associated with Hybrid Necrosis in Interspecific Crosses between Tetraploid Wheat and Aegilops tauschii Coss
Source: PubMed Central journal article supplement (PMC2892878; doi:10.1371/journal.pone.0011326), 2010-06-25
Supplement: pone.0011326.s003.pdf [file pone.0011326.s003.pdf]

**Table S3** Comparison of morphological traits among the WT and hybrid necrosis lines of synthetic hexaploid wheat

| Morphological trait <sup>a</sup>                     | WT           | type III necrosis |
|------------------------------------------------------|--------------|-------------------|
| 6th leaf blade length at the vegetative phase (cm)   | 25.84±4.91   | 18.07±9.45        |
| 6th leaf blade width at the vegetative phase (cm)*   | 0.74±0.11    | 0.53±0.13         |
| Ratio of length to width in 6th leaf blade           | 34.72±4.45   | 39.19±2.96        |
| Flag leaf length after heading (cm)                  | 28.50±4.90   | 23.06±2.49        |
| Flag leaf width after heading (cm)                   | 1.03±0.11    | 0.81±0.27         |
| Ratio of leaf to width in flag leaf                  | 27.89±3.82   | 29.60±6.51        |
| Length of leaf below the flag leaf (cm)              | 33.50±5.77   | 25.39±5.77        |
| Width of leaf below the flag leaf (cm)*              | 0.91±0.09    | 0.75±0.20         |
| Ratio of length to width in leaf below the flag leaf | 36.83±4.63   | 37.73±4.69        |
| Heading time (days)**                                | 153.24±6.17  | 171.00±3.54       |
| Flowering time (days)**                              | 163.25±4.59  | 176.58±2.95       |
| Culm length (cm)**                                   | 150.24±19.82 | 91.63±2.65        |
| 1st internode length (cm)**                          | 57.17±7.48   | 25.24±3.22        |
| 2nd internode length (cm)**                          | 28.46±4.11   | 14.03±2.52        |
| 3rd internode length (cm)**                          | 21.50±3.64   | 11.18±0.90        |
| Spike length (cm)                                    | 20.64±1.20   | 22.02±0.34        |
| Seed number per spike**                              | 25.41±6.23   | 12.95±0.06        |
| Selfed seed fertility (%)**                          | 84.36±15.68  | 39.17±8.25        |
| Seed weight (1000 seeds, g)*                         | 46.58±9.74   | 27.4±0.85         |

<sup>a</sup>Traits that show significant mean difference between WT and type III necrosis lines are indicated by \*  $P < 0.05$ , or \*\*  $P < 0.01$  (Student's *t* test).
