# Supplementary material for: Hypersensitive Response-Like Reaction Is Associated with Hybrid Necrosis in Interspecific Crosses between Tetraploid Wheat and Aegilops tauschii Coss
Source: PubMed Central journal article supplement (PMC2892878; doi:10.1371/journal.pone.0011326), 2010-06-25
Supplement: pone.0011326.s004.pdf [file pone.0011326.s004.pdf]

**Table S4** Morphological traits - Eigenvectors for PC1 and PC2

| Morphological trait                                  | PC1   | PC2   |
|------------------------------------------------------|-------|-------|
| 6th leaf blade length at the vegetative phase (cm)   | 0.24  | 0.20  |
| 6th leaf blade width at the vegetative phase (cm)    | 0.23  | -0.04 |
| Ratio of length to width of 6th leaf blade           | 0.01  | 0.39  |
| Flag leaf length after heading (cm)                  | 0.22  | 0.30  |
| Flag leaf width after heading (cm)                   | 0.28  | -0.04 |
| Ratio of leaf to width of flag leaf                  | 0.00  | 0.44  |
| Length of leaf below the flag leaf (cm)              | 0.28  | 0.23  |
| Width of leaf below the flag leaf (cm)               | 0.29  | 0.01  |
| Ratio of length to width of leaf below the flag leaf | 0.15  | 0.34  |
| Heading time (days)                                  | -0.12 | 0.38  |
| Flowering time (days)                                | -0.17 | 0.36  |
| Culm length (cm)                                     | 0.31  | -0.03 |
| 1st internode length (cm)                            | 0.32  | -0.03 |
| 2nd internode length (cm)                            | 0.32  | -0.05 |
| 3rd internode length (cm)                            | 0.30  | 0.00  |
| Spike length (cm)                                    | 0.01  | 0.05  |
| Seed number per spike                                | 0.21  | -0.20 |
| Selfed seed fertility (%)                            | 0.19  | -0.17 |
| Seed weight (1000 seeds, g)                          | 0.24  | 0.01  |
