# Supplementary material for: Hypersensitive Response-Like Reaction Is Associated with Hybrid Necrosis in Interspecific Crosses between Tetraploid Wheat and Aegilops tauschii Coss
Source: PubMed Central journal article supplement (PMC2892878; doi:10.1371/journal.pone.0011326), 2010-06-25
Supplement: pone.0011326.s005.pdf [file pone.0011326.s005.pdf]

**Table S5** List of the defense-related genes for which expression levels were altered in type III necrosis lines as inferred by microarray analysis

| Gene                                                     | up-regulated (>3-fold) |                 | down-regulated (<1/3-fold) |                 |
|----------------------------------------------------------|------------------------|-----------------|----------------------------|-----------------|
|                                                          | number of genes        | mean Log2 ratio | number of genes            | mean Log2 ratio |
| HR induced protein                                       | 1                      | 7.7             | 0                          | -               |
| dihydroflavonol 4-reductase                              | 2                      | 6.1             | 0                          | -               |
| sesquiterpene cyclase                                    | 1                      | 5.72            | 0                          | -               |
| defensin                                                 | 2                      | 5.47            | 0                          | -               |
| pathogenesis-related                                     | 9                      | 5.46            | 0                          | -               |
| flavanone-3-hydroxylase                                  | 4                      | 5.28            | 0                          | -               |
| germin                                                   | 6                      | 4.64            | 0                          | -               |
| WCI-1                                                    | 1                      | 4.54            | 0                          | -               |
| anthranilate N-benzoyltransferase                        | 1                      | 4.31            | 0                          | -               |
| chalcone synthase                                        | 7                      | 5.06            | 1                          | -2.22           |
| wax protein                                              | 2                      | 4               | 0                          | -               |
| secretory protein                                        | 1                      | 3.93            | 0                          | -               |
| cinnamoyl-CoA reductase                                  | 5                      | 3.85            | 0                          | -               |
| flavonoid 7-O-methyltransferase                          | 1                      | 3.7             | 0                          | -               |
| patatin                                                  | 3                      | 3.69            | 0                          | -               |
| chalcone isomerase                                       | 2                      | 3.46            | 0                          | -               |
| esterase                                                 | 3                      | 3.13            | 0                          | -               |
| phenylalanine ammonia-lyase                              | 18                     | 3.03            | 0                          | -               |
| Hfr family                                               | 4                      | 3.02            | 0                          | -               |
| soluble inorganic pyrophosphatase                        | 4                      | 2.93            | 0                          | -               |
| dioscorin class A                                        | 2                      | 5.16            | 1                          | -1.6            |
| chitinase                                                | 13                     | 3.76            | 2                          | -3.79           |
| harpin-induced 1                                         | 3                      | 4.27            | 1                          | -2.04           |
| MPI                                                      | 5                      | 2.68            | 0                          | -               |
| thaumatin-like protein                                   | 5                      | 2.67            | 0                          | -               |
| WIR                                                      | 4                      | 2.5             | 0                          | -               |
| caffeic acid O-methyltransferase                         | 5                      | 3.33            | 1                          | -2.89           |
| cinnamyl alcohol dehydrogenase                           | 3                      | 2.26            | 0                          | -               |
| lipoxygenase                                             | 15                     | 2.12            | 0                          | -               |
| Trans-cinnamate 4-monooxygenase                          | 1                      | 2.08            | 0                          | -               |
| TPR-like domain containing protein                       | 4                      | 2.06            | 0                          | -               |
| Multi antimicrobial extrusion protein                    | 1                      | 2.03            | 0                          | -               |
| BRASSINOSTEROID INSENSITIVE 1-associated receptor kinase | 2                      | 1.95            | 0                          | -               |
| naringenin,2-oxoglutarate 3-dioxygenase                  | 1                      | 1.85            | 0                          | -               |
| proteinase inhibitor                                     | 8                      | 3               | 2                          | -2.46           |

|                                                |     |      |    |       |
|------------------------------------------------|-----|------|----|-------|
| 4-coumarate--CoA ligase                        | 1   | 1.76 | 0  | -     |
| peroxidase                                     | 11  | 3.18 | 4  | -2.46 |
| cytochrome P450                                | 14  | 3.12 | 5  | -2.63 |
| disease resistance gene                        | 8   | 2.82 | 3  | -1.71 |
| quinone oxidoreductase                         | 1   | 2.36 | 0  | -     |
| glutathione S-transferase                      | 12  | 2.17 | 2  | -2.99 |
| xylanase inhibitor                             | 3   | 3.01 | 1  | -3.65 |
| lipase                                         | 5   | 2.68 | 2  | -2.09 |
| L-ascorbate oxidase                            | 2   | 4.68 | 2  | -2.4  |
| peptidase                                      | 6   | 2.5  | 4  | -1.88 |
| beta-1,3-glucanase                             | 5   | 4.6  | 4  | -4.23 |
| serpin                                         | 1   | 5.44 | 2  | -2.41 |
| 1-aminocyclopropane-1-carboxylate oxidase      | 1   | 2.11 | 1  | -1.86 |
| isopenicillin N synthase family protein        | 1   | 2.03 | 1  | -3.19 |
| O-methyltransferase                            | 1   | 2.96 | 3  | -2.52 |
| collagenase                                    | 0   | -    | 1  | -1.69 |
| extracellular invertase                        | 0   | -    | 1  | -1.7  |
| flower-specific gamma-thionin                  | 0   | -    | 1  | -1.89 |
| flavonol-3-O-glycoside-7-O-glucosyltransferase | 0   | -    | 1  | -1.9  |
| <hr/>                                          |     |      |    |       |
| Total                                          | 221 |      | 46 |       |
