# Supplementary material for: Hypersensitive Response-Like Reaction Is Associated with Hybrid Necrosis in Interspecific Crosses between Tetraploid Wheat and Aegilops tauschii Coss
Source: PubMed Central journal article supplement (PMC2892878; doi:10.1371/journal.pone.0011326), 2010-06-25
Supplement: pone.0011326.s006.pdf [file pone.0011326.s006.pdf]

**Table S6** List of the ROS alleviation and photosynthesis related genes for which expression levels were altered in type III necrosis lines as inferred by microarray analysis

| Gene                                         | up-regulated (>3-fold) |                 | down-regulated (<1/3-fold) |                 |
|----------------------------------------------|------------------------|-----------------|----------------------------|-----------------|
|                                              | number of genes        | mean log2 ratio | number of genes            | mean log2 ratio |
| <b><i>ROS alleviation related</i></b>        |                        |                 |                            |                 |
| alternative oxidase                          | 1                      | 2.31            | 0                          | -               |
| catalase                                     | 1                      | 1.75            | 0                          | -               |
| <b><i>Photosynthesis related</i></b>         |                        |                 |                            |                 |
| molecular mass early light-inducible protein | 1                      | 4.71            | 0                          | -               |
| psbE                                         | 0                      | -               | 1                          | -1.66           |
| ndhB                                         | 0                      | -               | 2                          | -1.72           |
| chloroplast chlorophyll a/b binding protein  | 0                      | -               | 1                          | -1.8            |
| psaB                                         | 0                      | -               | 1                          | -1.82           |
| chloroplast cytochrome f                     | 0                      | -               | 1                          | -1.88           |
| psbB                                         | 0                      | -               | 1                          | -1.88           |
| PSII 10-kD protein                           | 0                      | -               | 2                          | -4.5            |
