# Supplementary material for: Hypersensitive Response-Like Reaction Is Associated with Hybrid Necrosis in Interspecific Crosses between Tetraploid Wheat and Aegilops tauschii Coss
Source: PubMed Central journal article supplement (PMC2892878; doi:10.1371/journal.pone.0011326), 2010-06-25
Supplement: pone.0011326.s007.pdf [file pone.0011326.s007.pdf]

**Table S7** Primer sets for RT-PCR analysis in this study

| Gene                                               | forward primer sequence (5'~3') | reverse primer sequence (5'~3') |
|----------------------------------------------------|---------------------------------|---------------------------------|
| <i>hypersensitive-induced protein</i>              | ACTTAGGCTTAGGCAAATGGA           | TAGCCATAAGCAAACATAGCC           |
| <i>chitinase a</i>                                 | CCATAGCCAACGCCGAG               | GGCGTTATGGTTTTGGATGA            |
| <i>oxalate oxidase</i>                             | TCATCAATTTTCTGGCCTC             | GAGCCTATTTGGGTTGGATG            |
| <i>6-STS</i>                                       | TGATGGGGTACGTCGGCGAG            | TGGCGGAGCGGGATATGGA             |
| <i>2OG-Fe oxygenase</i>                            | CCCAACGCCCTCACCATC              | AGAGGAAGGAGGCGATGGAC            |
| <i>lipoxygenase</i>                                | CATCCACACCATCACCAGCC            | CAGCCCTTTCTCGCCGTC              |
| <i>CBL interacting protein kinase</i>              | CTCTCAACTGGACTCGACCT            | ACATCACACCTTTCCTTCCA            |
| <i>UBQ-carboxyl terminal hydrolase</i>             | CTTTGCTCCAGTTGCTC               | CATAATCATAACGCACAGAAC           |
| <i>phosphate transporter</i>                       | CAGGACCCGCACAAGCC               | CAGGACCCGCACAAGCC               |
| <i>PR-1</i>                                        | GCAGAACTCGCCTCAGGACT            | GCCGAGGTTATTGTTGCAGA            |
| <i>JA-induced protein</i>                          | AGAAGGTGAGTGGGCTATTG            | TGCCGCTGCTAACTGTG               |
| <i>PAL</i>                                         | GAAGACATTGAGCACCACCA            | TTTGGTAGCACTGCACGG              |
| <i>WRKY3</i>                                       | GAGGGCGAGCACACCACC              | CTCCCGGCACACCTTCTTCA            |
| <i>peroxidase</i>                                  | TTTACGATTGTTTTGTCAG             | GATGACCTCAAAACCACG              |
| <i>R gene</i>                                      | CTCGACGACATGCCGGGAC             | TTGACGCGCAGGCTGAGG              |
| <i>chloroplast ATP synthase CF1</i>                | TAGGAAATGATGCGGAACT             | CCTCTTCCCTTTTTCTTTGT            |
| <i>PsbB</i>                                        | GTTTTGGTAGATGAGGAGGG            | AGCAAAGCAAAGGTAGCAT             |
| <i>ethylene-responsive element binding protein</i> | CCGACGACTCCGCCAACC              | AAGGTGTGGGAGGGCGTCAA            |
| <i>Myb-like protein</i>                            | CAGCAAATGGTCAATCC               | ACAGCTTACGCTTGTT                |
| <i>amine oxidase family protein</i>                | AAGATGATACCCGACGCCAC            | CCCTTCCTCATCAGCAGCC             |
| <i>SAG</i>                                         | ACTCTGCTCCTCTGGCTTC             | CCATTTTGCTTATTCAGTGC            |
| <i>PSII 10kD protein</i>                           | GAAGGGTAGCCAAGGGGAAG            | ATTTTGGTTTGCCGCACAG             |
| <i>Waox1a</i>                                      | TGCTCGACAAGATCGCCTACT           | GGAGGCGCCAGTAGTCGAT             |
| <i>Waox1c</i>                                      | GGAGGCGTACACGTCGGACA            | GTCATCAGGTGCATCCGCTC            |
| <i>PR-4</i>                                        | CGCGGTGAGCGCCTACTG              | CCGATCCCCTTGGTGTCTG             |
| <i>PR-5</i>                                        | TCGGCGGTGCTCTTCCTCCTC           | GGCGACGTCGTTGGGGTGTT            |
| <i>Actin</i>                                       | GGCTGGTTTTGCTGGTGACGAAT         | AATGAAGGAAGGCTGGAAGAGGA         |
